# Supplementary material for: Targeting STEC-Induced Edema Disease in Weaned Piglets: Prophylactic Oral Phage P-GXEC-L2P5 Mitigates Vascular Endothelial Injury
Source: Research Square preprint supplement (doi:10.21203/rs.3.rs-6754528/v1), 2025-07-10
Supplement: Supplementary file 1 [file 26e1e37005bbb9ad0db5cd59.docx]

**Additional Table 2** Clinical symptom scoring criteria.

| Clinical symptoms | Score | | | |
| --- | --- | --- | --- | --- |
| 0 | 1 | 2 | 3 |
| Vitality | Good | Loose | Bad | - |
| Appetite | Good | Slightly poor | Poor | - |
| Respiration | Normal | Slightly quick | Quick | - |
| Feces | Normal | Loose stool | Moderate diarrhea | Severe diarrhea |
| Eyelid edema | Normal | Mild | Moderate | Severe |
| Neurologic impairment | Not impairment | Slightly | Moderate | Severe |
