# Supplementary material for: Targeting STEC-Induced Edema Disease in Weaned Piglets: Prophylactic Oral Phage P-GXEC-L2P5 Mitigates Vascular Endothelial Injury
Source: Research Square preprint supplement (doi:10.21203/rs.3.rs-6754528/v1), 2025-07-10
Supplement: Supplementary file 2 [file 48e8694a670c973c63545dec.docx]

**Additional Table 1** Virulence genes primer information.

| Name | Primer Sequence (5’-3’) | Temperature (℃) | Length (bp) |
| --- | --- | --- | --- |
| *E. coli.* | F-ATGCCAGTCCAGCGTTTTTGC | 58 | 238 |
| R-AAAGTGTGGGTCAATAATCAGGAAGTG |
| *K88* | F-GGTGATTTCAATGGTTCGGTC | 62 | 783 |
| R-ATTGCTACGTTCAGCGGAGCG |
| *K99* | F-TATTATCTTAGGTGGTATGG | 50 | 314 |
| R-GGTATCCTTTAGCAGCAGTATTTC |
| *987P* | F-CTGCCAGTCTATGCCAAGTG | 58 | 500 |
| R-ACGGTGTACCTGCTGAACGAATAG |
| *F18* | F-GTGAAAAGACTAGTGTTTATTTC | 50 | 510 |
| R-CTTGTAAGTAACCGCGTAAGC |
| *Sta* | F-GAAACAACATGACGGGAGGT | 56 | 227 |
| R-GCACAGGCAGGATTACAACA |
| *Stb* | F-TGCCTATGCATCTACACAATC | 55 | 216 |
| R-GCAGTGAGAAATGGACAATG |
| *LT* | F-CGGCGTTACTATCCTCTCTA | 55 | 378 |
| R-ATTGGGGGTTTTATTATTCC |
| *Stx1* | F-CGATGTTACGGTTTGTTACTGTGACAGC | 62 | 664 |
| R-AATGCCACGCTTCCCAGAATTG |
| *Stx2* | F-GTTTTGACCATCTTCGTCTGATTATTGAG | 62 | 281 |
| R-AGCGTAAGGCTTCTGCTGTGAC |
| *Stx2e* | F-AATAGTATACGGACAGCGAT | 58 | 422 |
| R-TCTGACATTCTGGTTGACTC |
