# Supplementary material for: Targeting STEC-Induced Edema Disease in Weaned Piglets: Prophylactic Oral Phage P-GXEC-L2P5 Mitigates Vascular Endothelial Injury
Source: Research Square preprint supplement (doi:10.21203/rs.3.rs-6754528/v1), 2025-07-10
Supplement: Supplementary file 3 [file 8e491f0ca9f4d2c3b2d3b50a.docx]

**Additional Table 3** The qPCR primers and reaction conditions for vascular endothelial integrity-associated factors.

| Name | Primer Sequence (5’-3’) | GenBank/Accession No. |
| --- | --- | --- |
| *GAPDH* | F-TGAAGGTCGGAGTGAACGGAT | 396823 |
| R-TGGGTGGAATCATACTGGAAC |
| *ZO-1* | F-CTATGTCCAGAATCTCGGAAAAG | 396567 |
| R-CCTTCCCCTCAGAAACCCATAC |
| *VCL* | F-CAATGCCCAGAATCTGATGCAA | NM_213934.1 |
| R-AGTGTAAATCCAGCATCCGTTC |
| *Cx43* | F-GAGGCGTGCCTACTTCACTT | NM_001244212.1 |
| R-CAGCGGTGGAATAGGCTTGA |
| *Gb4* | F-CCTCCTGCTGCTGTCACTCC | XM_047449137.1 |
| R-TCACATCTGAAGGGTGGGAG |
