# Supplementary material for: Targeting STEC-Induced Edema Disease in Weaned Piglets: Prophylactic Oral Phage P-GXEC-L2P5 Mitigates Vascular Endothelial Injury
Source: Research Square preprint supplement (doi:10.21203/rs.3.rs-6754528/v1), 2025-07-10
Supplement: Supplementary file 4 [file a5475a61aa2daf22d6e96909.docx]

**Additional Table 4** Results of the K-B disk diffusion method for determining the susceptibility of GXEC-STL2 to antibiotics.

| Antibiotic | Criteria of bacteriostatic zone (mm) | | | Inhibition circle diameter (mm) | Tolerance |
| --- | --- | --- | --- | --- | --- |
| Resistance (R) | Intermediary (I) | Sensitive (S) |
| Tildipirosin | ≤12 | 13-17 | ≥18 | 18 | S |
| Doxycycline | ≤14 | 15-18 | ≥19 | 15 | I |
| Cefquinaxime | ≤18 | 19-23 | ≥24 | 16 | R |
| Kanamycin | ≤10 | 11-14 | ≥15 | 6 | R |
| Tylenol | ≤12 | 13-14 | ≥15 | 6 | R |
| Enrofloxacin | ≤12 | 13-16 | ≥17 | 17 | I |
| Mucomycin | ≤11 | 12-15 | ≥16 | 11 | R |
| Ceftiofur | ≤11 | 12-22 | ≥23 | 6 | R |
| Amoxicillin | ≤13 | 14-17 | ≥18 | 19 | S |
| Gamycin | ≤15 | 16-19 | ≥20 | 14 | R |
| Tavanamycin | ≤12 | 13-15 | ≥16 | 12 | R |
| Gentamicin | ≤12 | 13-14 | ≥15 | 20 | S |
| Vicodin | ≤15 | 16-19 | ≥20 | 14 | R |
| Ampicillin | ≤7 | 8-11 | ≥12 | 20 | S |
| Streptomycin | ≤10 | 11-13 | ≥14 | 14 | S |
| Lincomycin | ≤10 | 11-15 | ≥16 | 6 | R |
| Neomycin | ≤12 | 13-15 | ≥16 | 11 | R |
| Ciprofloxacin | ≤15 | 16-20 | ≥21 | 6 | R |
| Florfenicol | ≤12 | 13-17 | ≥18 | 20 | S |
| Oxytetracycline | ≤12 | 13-15 | ≥16 | 6 | R |

**
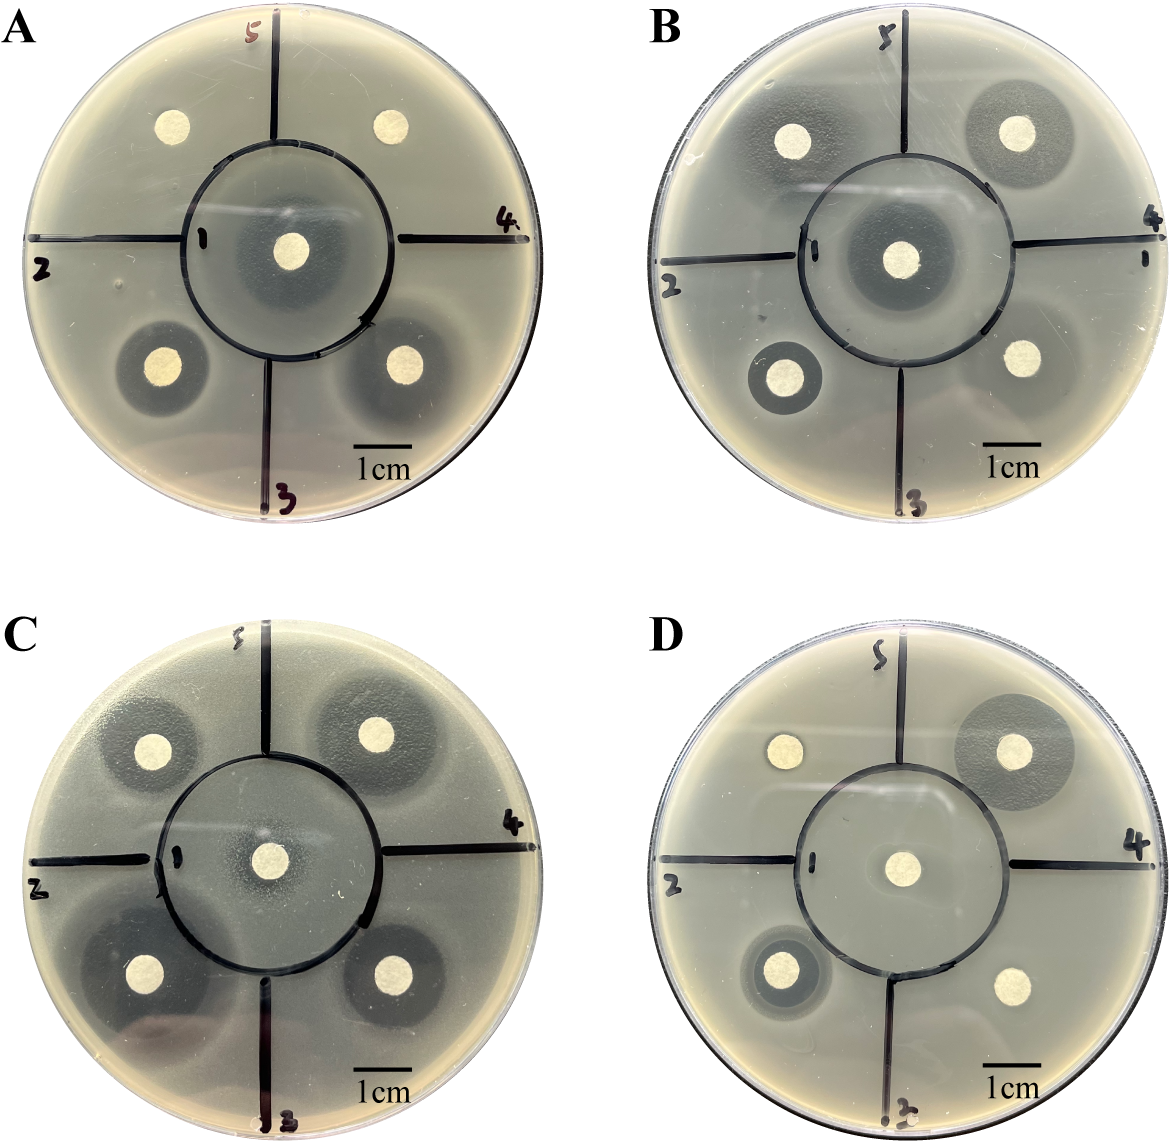
**

**Additional Figure 1** Results of the K-B disk diffusion method for determining the susceptibility of GXEC-STL2 to antibiotics. (A1, Tildipirosin; A2, Doxycycline; A3 Cefquinaxime; A4, Kanamycin; A5, Tylenol; B1, Enrofloxacin; B2, Mucomycin; B3, Ceftiofur; B4, Amoxicillin; B5, Gamycin; C1, Tavanamycin; C2, Gentamicin; C3, Vicodin; C4, Ampicillin; C5, Streptomycin; D1, Lincomycin; D2, Neomycin; D3, Ciprofloxacin; D4, Florfenicol; D5, Oxytetracycline)
